# Supplementary material
Source: MDPI journal article supplement (https://www.mdpi.com/2227-9717/4/3/33)
Supplement: s1 [file s1]

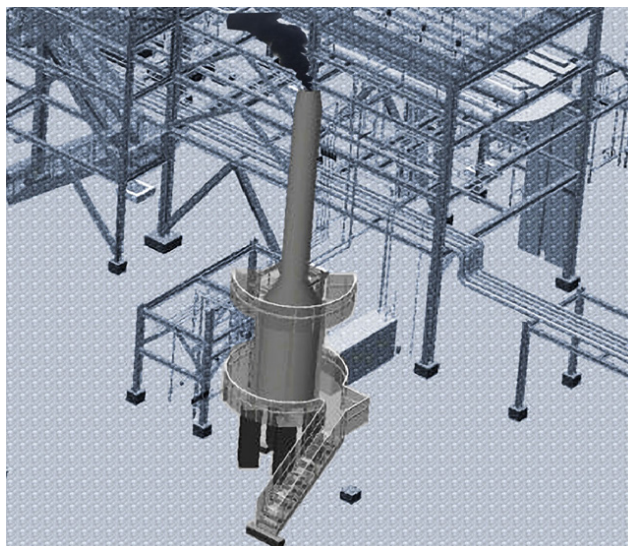

**Figure S1.** The industrial furnace of the domestic gas refinery.

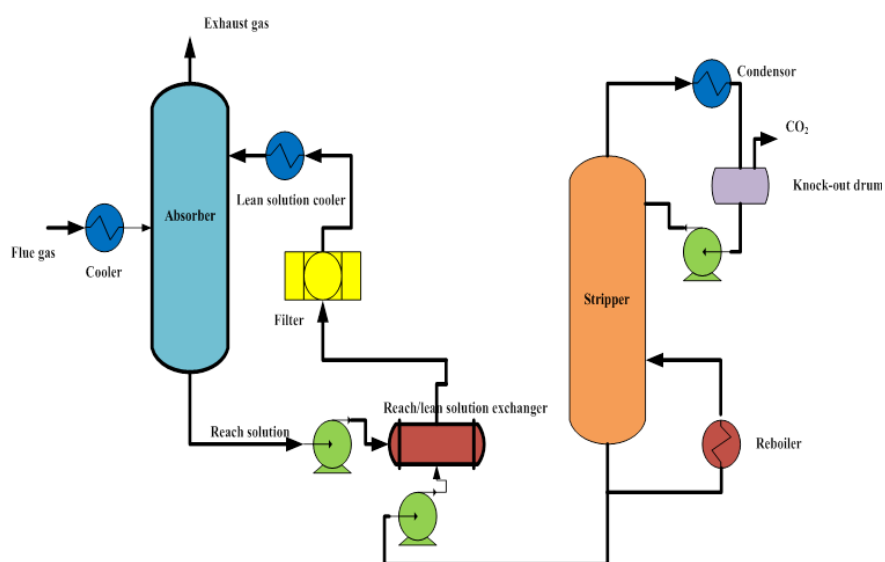

**Figure S2.** Process flow diagram of the CO<sub>2</sub> recovery unit.
